# Supplementary material
Source: Springer Nature journal article supplement (https://www.springermedizin.de/resource/supplementary/12967_2012_999_MOESM2_ESM.pdf/9573276)

**A**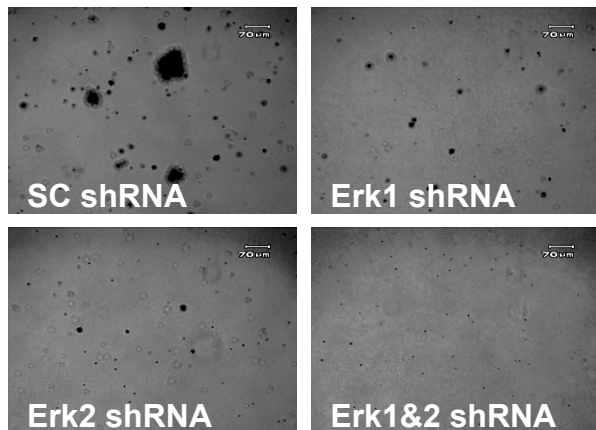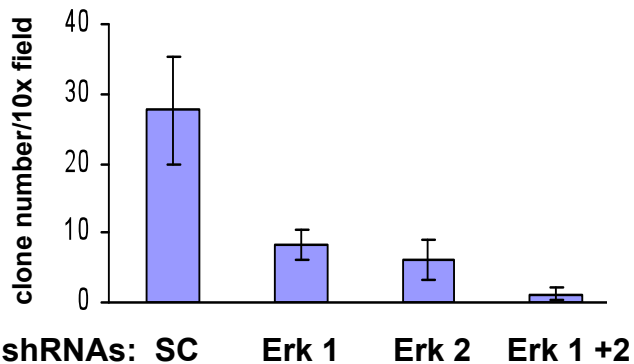**B**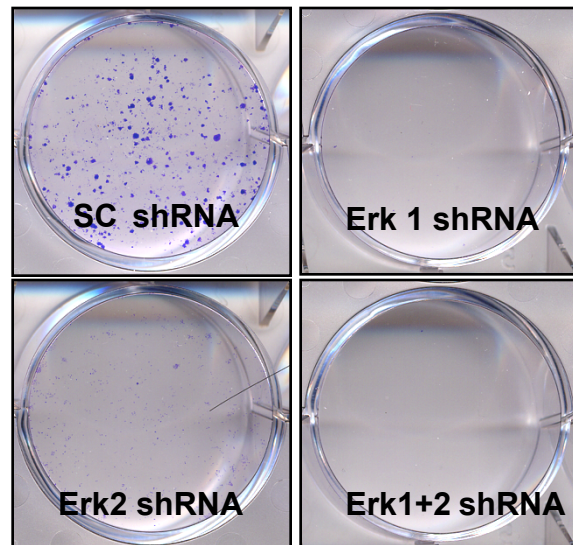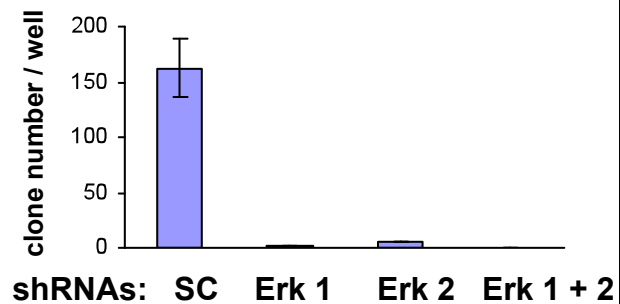

Supplement: MOESM2 [file 9573276]
